# Supplementary material for: Transfusion of Anaerobically or Conventionally Stored Blood After Hemorrhagic Shock
Source: PubMed Central journal article supplement — Shock. 2020 Feb 11;53(3):352–62. doi: 10.1097/SHK.0000000000001386 (PMC7017949; doi:10.1097/shk.0000000000001386), 2020-02-11
Supplement: shk-53-352-s002.pdf [file shk-53-352-s002.pdf]

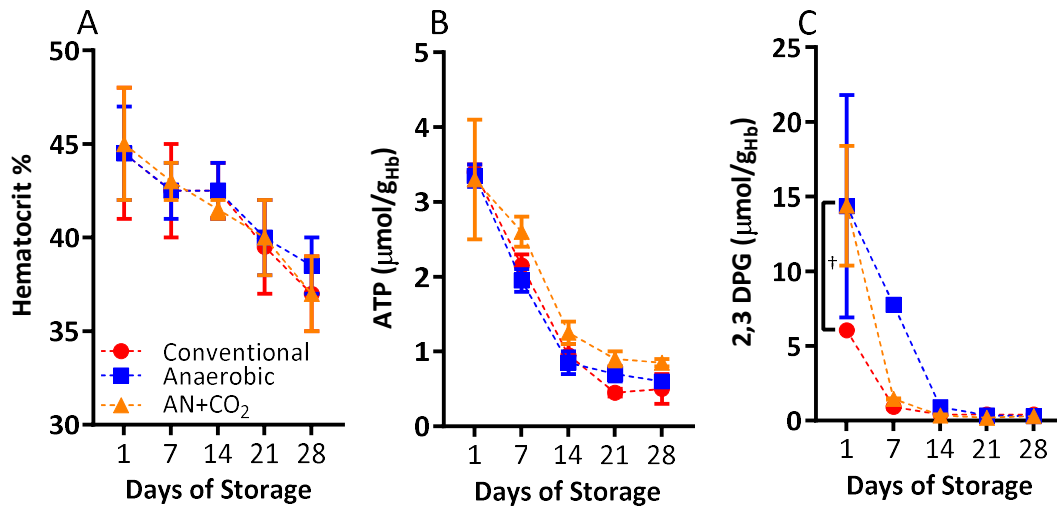

**Fig. S1.** Additional parameters of the stored blood over time. **(A)** Hematocrit decreases with storage time due to hemolysis. **(B)** ATP decreases during storage. **(C)** 2,3 DPG decreases with storage but starts elevated for anaerobically stored units. †P<0.05.
