# Supplementary material for: Transfusion of Anaerobically or Conventionally Stored Blood After Hemorrhagic Shock
Source: PubMed Central journal article supplement — Shock. 2020 Feb 11;53(3):352–62. doi: 10.1097/SHK.0000000000001386 (PMC7017949; doi:10.1097/shk.0000000000001386), 2020-02-11
Supplement: shk-53-352-s003.pdf [file shk-53-352-s003.pdf]

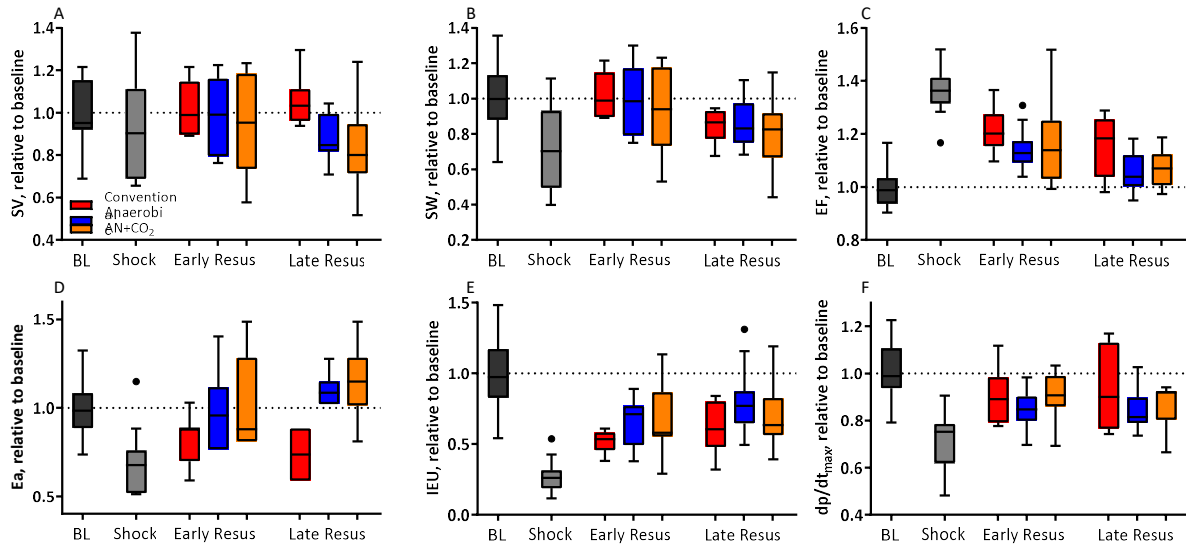

**Fig. S2.** Additional cardiac parameters. **(A)** Transfusion increases stroke volume, and stroke volume stays elevated in animals transfused with conventionally stored blood. **(B)** Stroke work increases shortly after transfusion but does not remain elevated. **(C)** Ejection fraction increases during shock and stays elevated post-resuscitation. Ejection fraction remains slightly higher for animals transfused with conventionally stored blood. **(D)** Arterial elastance improves in animals transfused with anaerobically stored blood. **(E)** Conventionally stored blood slightly impairs internal energy utilization post-resuscitation. **(F)** Isovolumic contraction rate decreases during shock and is partially restored with transfusion of any condition.
